# Supplementary material for: Catalytic ignition of N(CN)2− ionic liquid-H2O2 with zero-dimensional Cu-MOFs
Source: Royal Society of Chemistry journal article supplement (doi:10.1039/d4ta02498b), 2024-01-01
Supplement: d4ta02498b1.pdf [file d4ta02498b1.pdf]

## Supporting Information

### Catalytic ignition of $\text{N}(\text{CN})_2^-$ ionic liquid- $\text{H}_2\text{O}_2$ with zero-dimensional Cu-MOFs

Qing Cheng<sup>ab</sup>, Yuan Yao<sup>bc</sup>, Peihao Dou<sup>b</sup>, Long Liu<sup>c</sup>, Yingying Cao<sup>\*a</sup>, Yanqiang

Zhang<sup>\*abc</sup>

<sup>a</sup> College of Chemistry and Molecular Sciences, Henan University, Mingli Road North 379, 450046 Zhengzhou, China. E-mail: yqzhang@ipe.ac.cn.

<sup>b</sup> Zhengzhou Institute of Emerging Industrial Technology, East Third Ring Road and Jincheng Avenue Intersection East 300 meters, 450000, Zhengzhou, China.

<sup>c</sup> Institute of Process Engineering, Chinese Academy of Sciences, Beiertiao 1#, Zhongguancun, Haidian District, 100190 Beijing, China.

## Content

|                                                                                                                                                                                                                                                                                                   |    |
|---------------------------------------------------------------------------------------------------------------------------------------------------------------------------------------------------------------------------------------------------------------------------------------------------|----|
| <b>Table S1</b> Heats of formation of MOFs <b>1-4</b> . .....                                                                                                                                                                                                                                     | 4  |
| <b>Table S2</b> Crystallographic data and structure refinement details for MOFs <b>1-4</b> .....                                                                                                                                                                                                  | 5  |
| <b>Table S3</b> Selected bond lengths and bond angles of MOF <b>1</b> .....                                                                                                                                                                                                                       | 6  |
| <b>Table S4</b> Selected bond lengths and bond angles of MOF <b>2</b> .....                                                                                                                                                                                                                       | 6  |
| <b>Table S5</b> Selected bond lengths and bond angles of MOF <b>3</b> .....                                                                                                                                                                                                                       | 7  |
| <b>Table S6</b> Selected bond lengths and bond angles of MOF <b>4</b> .....                                                                                                                                                                                                                       | 7  |
| <b>Fig. S1</b> Angles of the plane formed by the para-tetrazole ring in <b>1</b> (a), and <b>2</b> (b).....                                                                                                                                                                                       | 9  |
| <b>Fig. S2</b> Structures of H <sub>4</sub> TTP single molecule (a) and stacking diagram (b) .....                                                                                                                                                                                                | 9  |
| <b>Fig. S3</b> FT-IR spectra of MOFs <b>1-4</b> .....                                                                                                                                                                                                                                             | 9  |
| <b>Fig. S4</b> FT-IR spectra of H <sub>4</sub> TTP, methacrylic acid and MOFs <b>1/4</b> .....                                                                                                                                                                                                    | 10 |
| <b>Fig. S5</b> PXRD patterns for MOFs <b>1-4</b> . .....                                                                                                                                                                                                                                          | 10 |
| <b>Fig. S6</b> $\Delta H_f$ of MOFs <b>3/4</b> + [BMIM]N(CN) <sub>2</sub> .....                                                                                                                                                                                                                   | 11 |
| <b>Fig. S7</b> $I_{sp}$ of MOFs <b>3/4</b> + [BMIM]N(CN) <sub>2</sub> .....                                                                                                                                                                                                                       | 11 |
| <b>Fig. S8</b> Decomposition temperatures (a) and variation rule (b) of MOF <b>3</b> + [BMIM]N(CN) <sub>2</sub> ....                                                                                                                                                                              | 12 |
| <b>Fig. S9</b> Decomposition temperatures (a) and variation rule (b) of MOF <b>4</b> + [BMIM]N(CN) <sub>2</sub> ....                                                                                                                                                                              | 12 |
| <b>Fig. S10</b> UV-vis spectra of MOF <b>3</b> + [BMIM]N(CN) <sub>2</sub> and its absorbance with time at 362 nm..                                                                                                                                                                                | 12 |
| <b>Fig. S11</b> The charge density difference plots for MOFs <b>1</b> (a) and <b>4</b> (b) The green and blue areas denote the electron accumulation and depletion regions, respectively. The C, N, O, Cu, and H atoms are represented by gold, blue, red, silver white balls, respectively ..... | 13 |
| <b>Fig. S12</b> EPR spectra (a) DMPO-·OH and (b) DMPO-·OOH in MOF <b>1</b> + [BMIM]N(CN) <sub>2</sub> + H <sub>2</sub> O <sub>2</sub> system .....                                                                                                                                                | 13 |
| <b>Fig. S13</b> EPR spectra (a) DMPO-·OH and (b) DMPO-·OOH in MOF <b>2</b> + [BMIM]N(CN) <sub>2</sub> + H <sub>2</sub> O <sub>2</sub> system .....                                                                                                                                                | 13 |
| <b>Fig. S14</b> EPR spectra (a) DMPO-·OH and (b) DMPO-·OOH in MOF <b>3</b> + [BMIM]N(CN) <sub>2</sub> + H <sub>2</sub> O <sub>2</sub> system .....                                                                                                                                                | 14 |
| <b>Fig. S15</b> DFT calculations of H <sub>2</sub> O <sub>2</sub> catalysed by MOF <b>1</b> .....                                                                                                                                                                                                 | 14 |
| <b>Fig. S16</b> Proposed catalytic mechanism of MOF <b>1</b> as catalyst.....                                                                                                                                                                                                                     | 15 |

## Computational Details:

### *characterization of single X-ray diffraction*

Data collections were performed using  $\phi$  and  $\omega$  scan. Non-hydrogen atoms located from the difference Fourier maps were refined anisotropically by full-matrix least-squares on  $F^2$ , using SHELXS-97. All hydrogen atoms were included in the calculated positions and refined isotropically using a riding model. Determinations of the crystal system, orientation matrix, and cell dimensions were performed according to the established procedures. Lorentz polarization and multiscan absorption correction were applied. All calculations were performed using SHELXL 97 and PLATON 99. The crystallographic data for **1-5** are listed in Table 1. Moreover, the selected bonds distances and bond angles are summarized in Supporting Information Table S1.

### *DFT calculations*

Density function theory (DFT) calculations were carried out using Gaussian 16 programs<sup>1</sup> throughout this manuscript. Geometric optimizations of the reactants, transition states, and products were performed using TPSSh hybrid function<sup>2</sup>. The standard 6-31G(d,p) basis set<sup>3-5</sup> for H, C, N and O was used. For the Cu atoms, the SDD basis set and its corresponding effective core potential<sup>6</sup> was used. Harmonic vibration frequency calculations were performed for all stationary points to confirm them as a local minima or transition state. The intrinsic reaction coordinate (IRC) scheme<sup>7-8</sup> was applied for the calculations of the reaction coordinates to confirm whether or not the transition states were directly connected to the reactants and products. Gibbs free energy (G) was calculated using Shermo software<sup>9</sup>.

### *Heats of Formation*

The heat of formation ( $\Delta H_f$ ) of MOFs were calculated using the following reaction<sup>10</sup>:

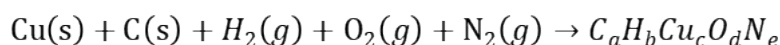

These calculations were performed by using CP2K 2023.1<sup>11</sup>. Hybrid function PBE0 function<sup>12</sup> combined with Grimme D3 dispersion correction<sup>13</sup> were employed. And the plane wave energy cutoff was set as 400 eV. All structure was first optimized under the DZVP-MOLOPT-SR-GTH basis set<sup>14</sup>, and then the single point energy was calculated under the pob-TZVP basis set<sup>15</sup>. The optimization was considered to converge when the following criteria were met: a maximum energy change of  $10^{-6}$  eV per atom and a maximum force on atom of  $0.00045 \text{ eV}\cdot\text{\AA}^{-1}$ . The input files were obtained with the assistance of the Multiwfn software<sup>16</sup>.

The calculation results of the catalysts are shown in Table S1.

**Table S1** Heats of formation of MOFs 1-4.

| Sample                                                   | MOF 1   | MOF 2   | MOF 3   | MOF 4   |
|----------------------------------------------------------|---------|---------|---------|---------|
| $\Delta H_f(\text{solid, 298K, kJ}\cdot\text{mol}^{-1})$ | -3642.4 | -3575.1 | -8454.3 | -9802.4 |

To the MOF + [BMIM]N(CN)<sub>2</sub> mixtures, the heat of formations were calculated through Equations 1-4. MOF: Fuel = x: y = 0.99:0.01, 0.97:0.03, 0.95:0.05, 0.93:0.07, 0.91:0.09, 0.89:0.11, 0.87:0.13, 0.85:0.15. The  $\Delta H_f$  of [BMIM]N(CN)<sub>2</sub> was obtained from the literature<sup>17</sup>.

$$n_{MOF} = \frac{x}{M_{MOF}} \quad (1)$$

$$n_{IL} = \frac{y}{M_{IL}} \quad (2)$$

$$n_{sum} = n_{MOF} + n_{IL} = \frac{x}{M_{MOF}} + \frac{y}{M_{IL}} \quad (3)$$

$$\Delta_f H_{mix} = \frac{n_{MOF}}{n_{sum}} * \Delta_f H_{MOF} + \frac{n_{IL}}{n_{sum}} * \Delta_f H_{IL} \quad (4)$$

## References

- 1 Gaussian 16, Revision C.01, M. Frisch, G. Trucks, H. Schlegel, G. Scuseria, M. Robb, J. Cheeseman, G. Scalmani, V. Barone, G. Petersson, H. Nakatsuji, X. Li, M. Caricato, A. Marenich, J. Bloino, B. Janesko, R. Gomperts, B. Mennucci, H. Hratchian, J. Ortiz, A. Izmaylov, J. Sonnenberg, Y. Williams, F. Ding, F. Lipparini, F. Egidi, J. Goings, B. Peng, A. Petrone, T. Henderson, D. Ranasinghe, V. Zakrzewski, J. Gao, N. Rega, G. Zheng, W. Liang, M. Hada, M. Ehara, K. Toyota, R. Fukuda, J. Hasegawa, M. Ishida, T. Nakajima, Y. Honda, O. Kitao, H. Nakai, T. Vreven, K. Throssell, J. Montgomery, J. Peralta, F. Ogliaro, M. Bearpark, J. Heyd, E. Brothers, K. Kudin, V. Staroverov, T. Keith, R. Kobayashi, J. Normand, K. Raghavachari, A. Rendell, J. Burant, S. Iyengar, J. Tomasi, M. Cossi, J. Millam, M. Klene, C. Adamo, R. Cammi, J. Ochterski, R. Martin, K. Morokuma, O. Farkas, J. Foresman, D. Fox, Inc. Gaussian, Wallingford CT, 2016.
- 2 V. Staroverov, G. Scuseria, J. Tao, and J. Perdew, *J. Chem. Phys.*, 2003, **119**, 12129-12137.
- 3 W. Hehre, R. Ditchfield and J. Pople, *J. Chem. Phys.*, 1972, **56**, 5255-5257.
- 4 M. Francl, W. Pietro, W. Hehre, J. Binkley, M. Gordon, D. DeFrees and J. Pople, *J. Chem. Phys.*, 1982, **77**, 3654-3665.
- 5 T. Clark, J. Chandrasekhar and P. Schleyer, *J. Comp. Chem.*, 1983, **4**, 294-301.
- 6 M. Dolg, U. Wedig, H. Stoll, and H. Preuss, *J. Chem. Phys.*, 1987, **86**, 866-872.
- 7 K. Fukui, *J. Phys. Chem.*, 1970, **74**, 4161-4163.
- 8 K. Fukui, *Acc. Chem. Res.*, 1981, **14**, 363-368.
- 9 T. Lu, Q. Chen, *Comput. Theor. Chem.*, 2021, **1200**, 113249.
- 10 O. Jobin, C. Mottillo, H. Titi, *Chem. Sci.*, 2022, **13**, 3424-3436.

- 11 T. Kühne, M. Iannuzzi, B. Del., *J. Chem. Phys.*, 2020, **152**. 194103.  
 12 C Adamo, V Barone. *J. Chem. Phys.*, 1999, **110**, 6158-6170.  
 13 S. Grimme, J. Antony, S. Ehrlich, *J. Chem. Phys.*, 2010, **132**. 154104.  
 14 V. Vondele, J. Hutter, *J. Chem. Phys.*, 2007, **127**. 114105.  
 15 M. Peintinger, D. Oliveira, T. Bredow, *J. Comput. Chem.*, 2013, **34**, 451-459.  
 16 T. Lu, F. Chen, *J. Comput. Chem.*, 2012, **33**, 580-592.  
 17 A. Thomas, K. Stober, R. Otaibi, *52nd AIAA/SAE/ASEE Joint Propulsion Conference*, 2016.

**Table S2** Crystallographic data and structure refinement details for MOFs 1-4

| MOF                                      | 1                                                                               | 2                                                                               | 3                                               | 4                                                               |
|------------------------------------------|---------------------------------------------------------------------------------|---------------------------------------------------------------------------------|-------------------------------------------------|-----------------------------------------------------------------|
| formula                                  | C <sub>8</sub> H <sub>12</sub> Cu <sub>2</sub> N <sub>22</sub> O <sub>2.5</sub> | C <sub>8</sub> H <sub>12</sub> Cu <sub>2</sub> N <sub>22</sub> O <sub>2.4</sub> | C <sub>14</sub> H <sub>20</sub> Cu <sub>2</sub> | C <sub>18</sub> H <sub>28</sub> Cu <sub>2</sub> O <sub>10</sub> |
| fw                                       | 583.48                                                                          | 581.88                                                                          | 475.40                                          | 531.5                                                           |
| T/K                                      | 118.1                                                                           | 123.0                                                                           | 273                                             | 273                                                             |
| crystal system                           | orthorhombic                                                                    | orthorhombic                                                                    | monoclinic                                      | monoclinic                                                      |
| space group                              | P2na                                                                            | Pbcn                                                                            | P 2 <sub>1</sub> /n                             | C 2/c                                                           |
| a (Å)                                    | 13.4957(5)                                                                      | 15.0819(19)                                                                     | 7.6004(4)                                       | 37.398(3)                                                       |
| b (Å)                                    | 9.9441(6)                                                                       | 13.4307(14)                                                                     | 9.0452(5)                                       | 6.9621(4)                                                       |
| c (Å)                                    | 15.0536(7)                                                                      | 9.9113(14)                                                                      | 14.0935(9)                                      | 18.7788(14)                                                     |
| α (deg)                                  | 90                                                                              | 90                                                                              | 90                                              | 90                                                              |
| β (deg)                                  | 90                                                                              | 90                                                                              | 97.329(2)                                       | 97.255(3)                                                       |
| γ (deg)                                  | 90                                                                              | 90                                                                              | 90                                              | 90                                                              |
| V (Å <sup>3</sup> )                      | 2020.24(16)                                                                     | 2007.6(4)                                                                       | 960.97(10)                                      | 4850.3(6)                                                       |
| Z                                        | 4                                                                               | 4                                                                               | 2                                               | 8                                                               |
| ρ (g·cm <sup>-3</sup> )                  | 1.918                                                                           | 1.925                                                                           | 1.643                                           | 1.456                                                           |
| abs coeff (mm <sup>-1</sup> )            | 2.172                                                                           | 2.185                                                                           | 2.260                                           | 1.799                                                           |
| F (000)                                  | 1168                                                                            | 1165                                                                            | 484.0                                           | 2192.0                                                          |
| GOF                                      | 1.043                                                                           | 1.014                                                                           | 0.943                                           | 1.089                                                           |
| data/restraints/parame                   | 3441/19/326                                                                     | 1949/6/159                                                                      | 3809/0/139                                      | 5579/376/277                                                    |
| R <sub>1</sub> (I > 2σ(I)) <sup>a</sup>  | 0.0438                                                                          | 0.0934                                                                          | 0.0292                                          | 0.0529                                                          |
| wR <sub>2</sub> (I > 2σ(I)) <sup>b</sup> | 0.0963                                                                          | 0.2067                                                                          | 0.0789                                          | 0.1439                                                          |

<sup>a</sup>R<sub>1</sub> =  $\sum |F_o| - |F_c| / \sum |F_o|$ , <sup>b</sup>wR<sub>2</sub> =  $\{\sum [w(F_o^2 - F_c^2)^2] / \sum [w(F_o^2)^2]\}^{1/2}$ .

**Table S3** Selected bond lengths and bond angles of MOF 1

| Atom                     | Length (Å) | Atom                     | Length (Å) |
|--------------------------|------------|--------------------------|------------|
| Cu1-N18                  | 2.013(7)   | Cu2-N16 <sup>2</sup>     | 2.434(6)   |
| Cu1-N22                  | 1.997(8)   | Cu2-N10                  | 1.998(7)   |
| Cu1-N4 <sup>1</sup>      | 2.292(7)   | Cu2-N19                  | 2.011(7)   |
| Cu1-N14                  | 2.031(7)   | Cu2-N20                  | 2.006(7)   |
| Cu1-N21                  | 2.031(8)   | N4-Cu1 <sup>1</sup>      | 2.292(7)   |
| Cu2-N6                   | 2.013(8)   | N16-Cu2 <sup>2</sup>     | 2.434(6)   |
| Atom                     | Angle (°)  | Atom                     | Angle (°)  |
| N18-Cu1-N4 <sup>1</sup>  | 96.8(3)    | N19-Cu2-N16 <sup>2</sup> | 83.2(3)    |
| N18-Cu1-N14              | 85.5(3)    | N20-Cu2-N6               | 173.9(3)   |
| N18-Cu1-N21              | 169.1(3)   | N20-Cu2-N16 <sup>2</sup> | 89.8(3)    |
| N22-Cu1-N18              | 91.7(3)    | N20-Cu2-N19              | 92.0(3)    |
| N22-Cu1-N4 <sup>1</sup>  | 92.5(3)    | N5-N6-Cu2                | 122.3(5)   |
| N22-Cu1-N14              | 171.1(3)   | C1-N6-Cu2                | 132.0(5)   |
| N22-Cu1-N21              | 92.8(3)    | N17-N18-Cu1              | 121.5(5)   |
| N14-Cu1-N4 <sup>1</sup>  | 96.2(3)    | C7-N18-Cu1               | 131.7(5)   |
| N14-Cu1-N21              | 88.5(3)    | N3-N4-Cu1 <sup>1</sup>   | 124.1(5)   |
| N21-Cu1-N4 <sup>1</sup>  | 93.0(3)    | N5-N4-Cu1 <sup>1</sup>   | 125.3(5)   |
| N6-Cu2-N16 <sup>2</sup>  | 94.5(3)    | N15-N16-Cu2 <sup>2</sup> | 127.8(6)   |
| N10-Cu2-N6               | 85.7(3)    | N17-N16-Cu2 <sup>2</sup> | 121.9(4)   |
| N10-Cu2-N16 <sup>2</sup> | 93.9(3)    | C5-N14-Cu1               | 133.7(7)   |
| N10-Cu2-N19              | 176.6(3)   | N9-N10-Cu2               | 121.0(5)   |
| N10-Cu2-N20              | 89.8(3)    | C4-N10-Cu2               | 134.9(7)   |
| N19-Cu2-N6               | 92.6(3)    |                          |            |

Noted: <sup>1</sup>+X,-1-Y,-1-Z; <sup>2</sup>+X,-2-Y,-1-Z

**Table S4** Selected bond lengths and bond angles of MOF 2

| Atom                                 | Length (Å) | Atom                   | Length (Å) |
|--------------------------------------|------------|------------------------|------------|
| Cu1-N9 <sup>1</sup>                  | 2.013(8)   | Cu1-N1 <sup>1</sup>    | 1.987(9)   |
| Cu1-N7 <sup>2</sup>                  | 2.329(7)   | N9-Cu1 <sup>1</sup>    | 2.013(8)   |
| Cu1-N2                               | 2.004(8)   | N7-Cu1 <sup>2</sup>    | 2.329(7)   |
| Cu1-N10                              | 2.008(7)   |                        |            |
| Atom                                 | Angle (°)  | Atom                   | Angle (°)  |
| N9 <sup>1</sup> -Cu1-N7 <sup>2</sup> | 96.5(3)    | N11-Cu1-N2             | 174.5(4)   |
| N2-Cu1-N9 <sup>1</sup>               | 84.7(3)    | N11-Cu1-N10            | 92.4(4)    |
| N2-Cu1-N7 <sup>2</sup>               | 96.1(3)    | N8-N9-Cu1 <sup>1</sup> | 122.3(6)   |
| N2-Cu1-N10                           | 90.0(3)    | C4-N9-Cu1 <sup>1</sup> | 131.8(6)   |
| N10-Cu1-N9 <sup>1</sup>              | 170.4(3)   | N8-N7-Cu1 <sup>2</sup> | 122.7(6)   |
| N10-Cu1-N7 <sup>2</sup>              | 92.0(3)    | N6-N7-Cu1 <sup>2</sup> | 126.2(6)   |
| N11-Cu1-N9 <sup>1</sup>              | 92.2(3)    | C1-N2-Cu1              | 133.5(7)   |
| N11-Cu1-N7 <sup>2</sup>              | 88.8(4)    | N3-N2-Cu1              | 120.8(6)   |

Noted: <sup>1</sup>-X,2-Y,-Z; <sup>2</sup>-X,+Y,-1/2-Z

**Table S5** Selected bond lengths and bond angles of MOF 3

| Atom                                  | Length (Å) | Atom                    | Length (Å) |
|---------------------------------------|------------|-------------------------|------------|
| Cu1-Cu1 <sup>1</sup>                  | 2.6201(3)  | Cu1-O4                  | 1.9678(11) |
| Cu1-O1 <sup>1</sup>                   | 1.9561(11) | Cu1-O5                  | 2.1812(12) |
| Cu1-O2                                | 1.9473(11) | O1-Cu1 <sup>1</sup>     | 1.9561(11) |
| Cu1-O3 <sup>1</sup>                   | 1.9831(11) | O3-Cu1 <sup>1</sup>     | 1.9831(11) |
| Atom                                  | Angle (°)  | Atom                    | Angle (°)  |
| O1 <sup>1</sup> -Cu1-Cu1 <sup>1</sup> | 81.81(4)   | O3 <sup>1</sup> -Cu1-O5 | 91.87(5)   |
| O1 <sup>1</sup> -Cu1-O3 <sup>1</sup>  | 89.60(5)   | O4-Cu1-Cu1 <sup>1</sup> | 85.68(3)   |
| O1 <sup>1</sup> -Cu1-O4               | 90.17(5)   | O4-Cu1-O3 <sup>1</sup>  | 168.77(5)  |
| O1 <sup>1</sup> -Cu1-O5               | 93.20(5)   | O4-Cu1-O5               | 99.35(5)   |
| O2-Cu1-Cu1 <sup>1</sup>               | 86.94(4)   | O5-Cu1-Cu1 <sup>1</sup> | 172.96(5)  |
| O2-Cu1-O1 <sup>1</sup>                | 168.75(5)  | C3-O1-Cu1 <sup>1</sup>  | 125.33(11) |
| O2-Cu1-O3 <sup>1</sup>                | 89.38(5)   | C3-O2-Cu1 <sup>1</sup>  | 120.14(10) |
| O2-Cu1-O4                             | 88.66(5)   | C6-O3-Cu1 <sup>1</sup>  | 123.90(9)  |
| O2-Cu1-O5                             | 98.03(5)   | C6-O4-Cu1 <sup>1</sup>  | 122.18(10) |
| O3 <sup>1</sup> -Cu1-Cu1 <sup>1</sup> | 83.17(3)   | C7-O5-Cu1 <sup>1</sup>  | 124.68(12) |

Noted: <sup>1</sup>1-X,1-Y,1-Z

**Table S6** Selected bond lengths and bond angles of MOF 4

| Atom                                  | Length (Å) | Atom                                  | Length (Å) |
|---------------------------------------|------------|---------------------------------------|------------|
| Cu1-Cu1 <sup>1</sup>                  | 2.5835(8)  | Cu2-Cu2 <sup>2</sup>                  | 2.5823(8)  |
| Cu1-O1                                | 1.944(3)   | Cu2-O6                                | 1.953(3)   |
| Cu1-O2 <sup>1</sup>                   | 1.955(3)   | Cu2-O7 <sup>2</sup>                   | 1.962(3)   |
| Cu1-O3                                | 1.957(3)   | Cu2-O8                                | 1.959(3)   |
| Cu1-O4 <sup>1</sup>                   | 1.947(3)   | Cu2-O9 <sup>2</sup>                   | 1.952(3)   |
| Cu1-O5                                | 2.135(3)   | Cu2-O10                               | 2.136(3)   |
| O2-Cu1 <sup>1</sup>                   | 1.955(3)   | O7-Cu2 <sup>2</sup>                   | 1.962(3)   |
| O4-Cu1 <sup>1</sup>                   | 1.947(3)   | O9-Cu2 <sup>2</sup>                   | 1.952(3)   |
| Atom                                  | Angle (°)  | Atom                                  | Angle (°)  |
| O1-Cu1-Cu1 <sup>1</sup>               | 84.65(9)   | O6-Cu2-Cu2 <sup>2</sup>               | 84.41(9)   |
| O1-Cu1-O2 <sup>1</sup>                | 168.78(13) | O6-Cu2-O7 <sup>2</sup>                | 168.64(12) |
| O1-Cu1-O3                             | 88.80(15)  | O6-Cu2-O8                             | 89.84(15)  |
| O1-Cu1-O4 <sup>1</sup>                | 90.96(13)  | O6-Cu2-O10                            | 95.95(12)  |
| O1-Cu1-O5                             | 96.23(13)  | O7 <sup>2</sup> -Cu2-Cu2 <sup>2</sup> | 84.34(9)   |
| O2 <sup>1</sup> -Cu1-Cu1 <sup>1</sup> | 84.28(10)  | O7 <sup>2</sup> -Cu2-O10              | 95.35(12)  |
| O2 <sup>1</sup> -Cu1-O3               | 88.30(17)  | O8-Cu2-Cu2 <sup>2</sup>               | 85.35(10)  |
| O2 <sup>1</sup> -Cu1-O5               | 94.85(13)  | O8-Cu2-O7 <sup>2</sup>                | 87.69(16)  |
| O3-Cu1-Cu1 <sup>1</sup>               | 84.55(9)   | O8-Cu2-O10                            | 96.70(13)  |
| O3-Cu1-O5                             | 95.81(13)  | O9 <sup>2</sup> -Cu2-Cu2 <sup>2</sup> | 83.61(9)   |
| O4 <sup>1</sup> -Cu1-Cu1 <sup>1</sup> | 83.95(8)   | O9 <sup>2</sup> -Cu2-O6               | 89.86(14)  |
| O4 <sup>1</sup> -Cu1-O2 <sup>1</sup>  | 89.72(15)  | O9 <sup>2</sup> -Cu2-O7 <sup>2</sup>  | 90.45(15)  |
| O4 <sup>1</sup> -Cu1-O3               | 168.47(12) | O9 <sup>2</sup> -Cu2-O8               | 168.93(13) |

|                         |            |                          |            |
|-------------------------|------------|--------------------------|------------|
| O4 <sup>1</sup> -Cu1-O5 | 95.67(12)  | O9 <sup>2</sup> -Cu2-O10 | 94.33(13)  |
| O5-Cu1-Cu1 <sup>1</sup> | 179.05(11) | O10-Cu2-Cu2 <sup>2</sup> | 177.91(10) |
| C4-O1-Cu1               | 123.3(3)   | C13-O6-Cu2               | 123.6(3)   |
| C4-O2-Cu1 <sup>1</sup>  | 122.8(3)   | C13-O7-Cu2 <sup>2</sup>  | 123.3(3)   |
| C8-O3-Cu1               | 123.1(3)   | C17-O8-Cu2               | 122.3(3)   |
| C8-O4-Cu1 <sup>1</sup>  | 124.3(2)   | C17-O9-Cu2 <sup>2</sup>  | 124.8(3)   |
| C9-O5-Cu1               | 127.2(3)   | C18-O10-Cu2              | 125.4(3)   |

Noted: <sup>1</sup>2-X,1-Y,1-Z; <sup>2</sup>3/2-X,3/2-Y,1-Z

---



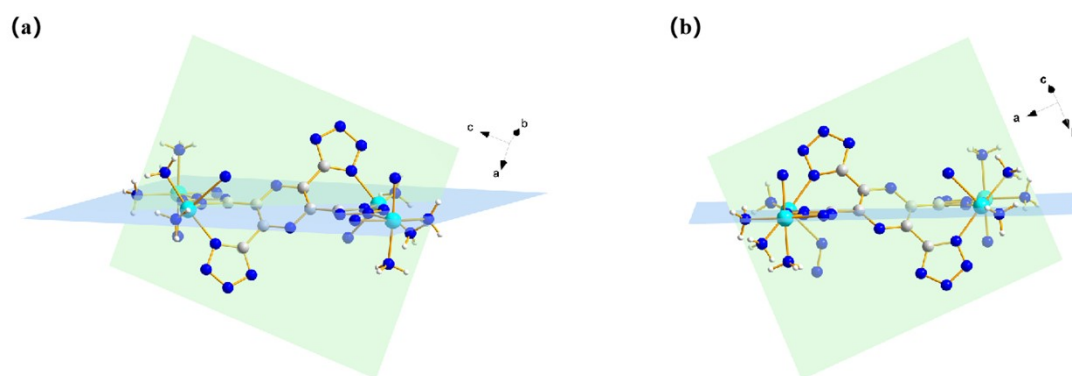

**Fig. S1** Angles of the plane formed by the para-tetrazole ring in **1** (a), and **2** (b)

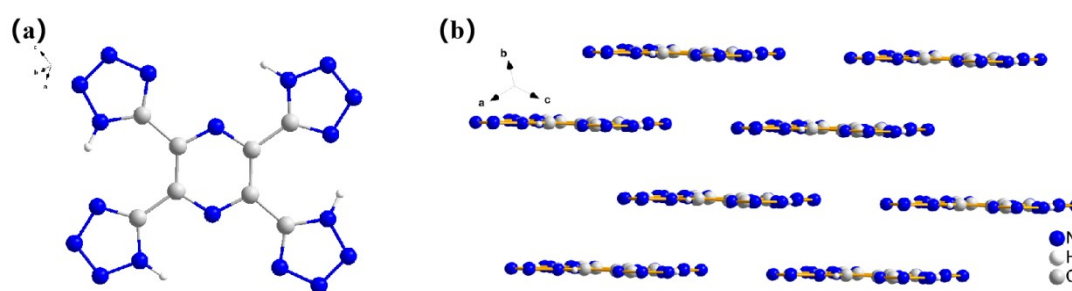

**Fig. S2** Structures of H<sub>4</sub>TTP single molecule (a) and stacking diagram (b)

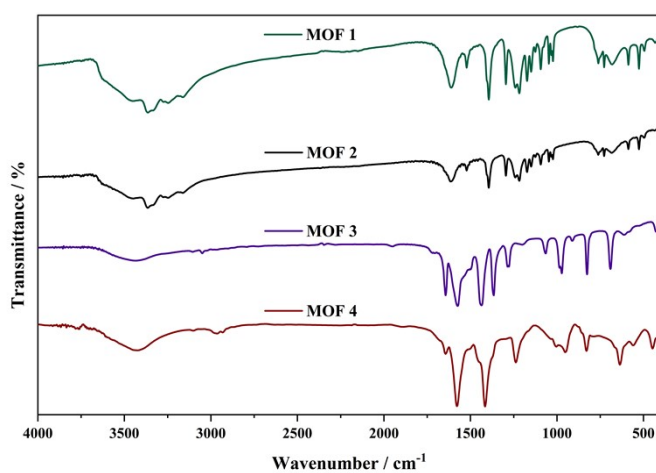

**Fig. S3** FT-IR spectra of MOFs 1-4

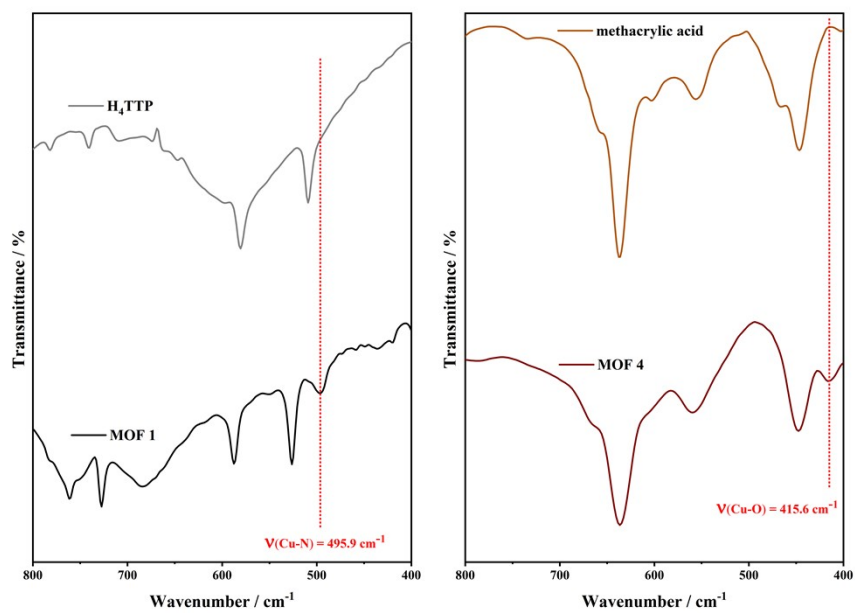

Fig. S4 FT-IR spectra of H<sub>4</sub>TTP, methacrylic acid and MOFs 1/4

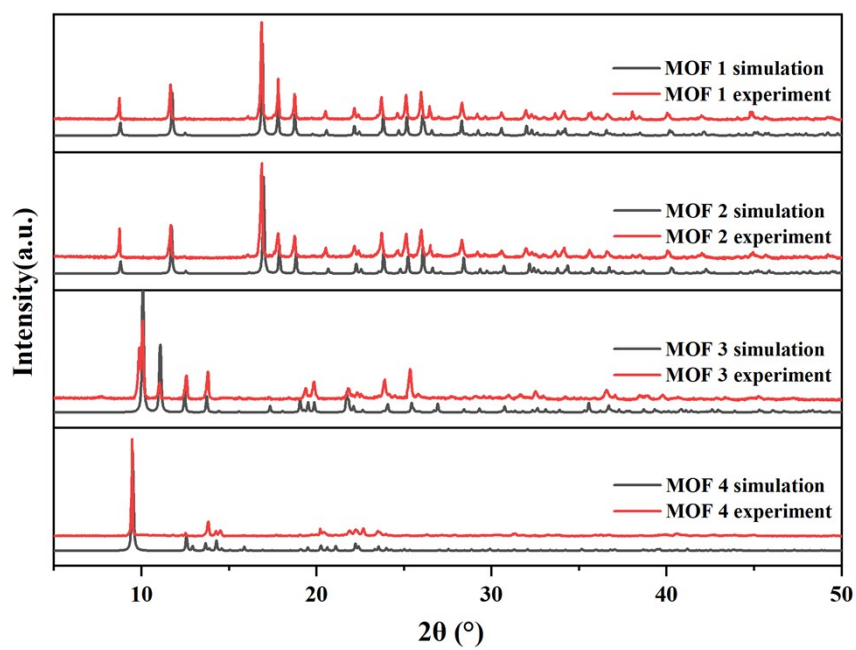

Fig. S5 PXRD patterns for MOFs 1-4.

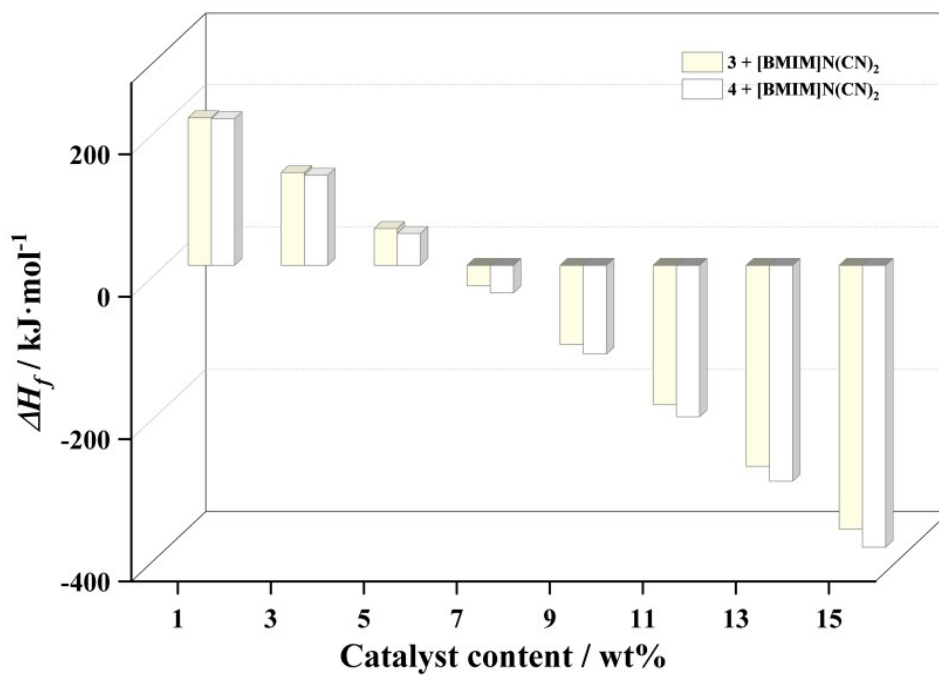

Fig. S6  $\Delta H_f$  of MOFs 3/4 + [BMIM]N(CN)<sub>2</sub>

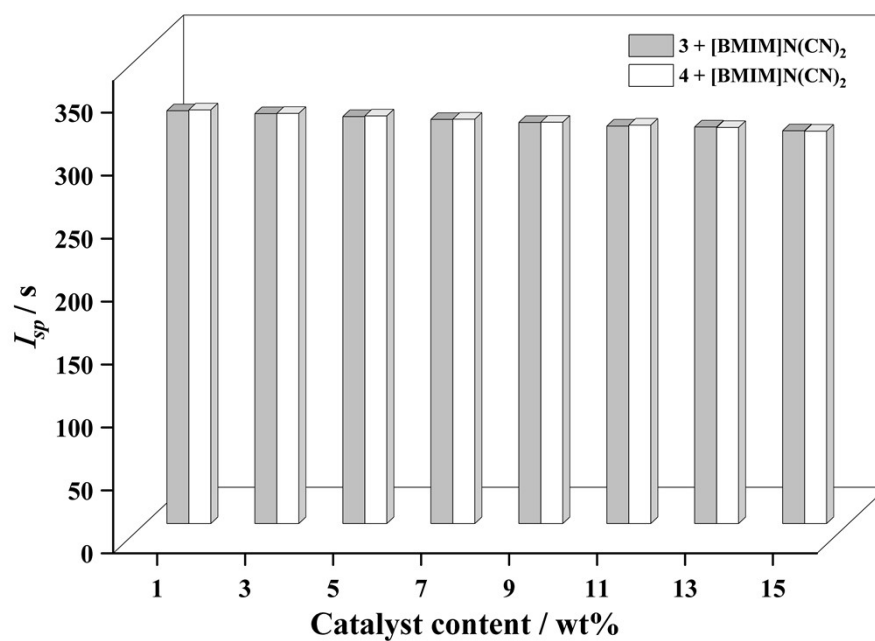

Fig. S7  $I_{sp}$  of MOFs 3/4 + [BMIM]N(CN)<sub>2</sub>

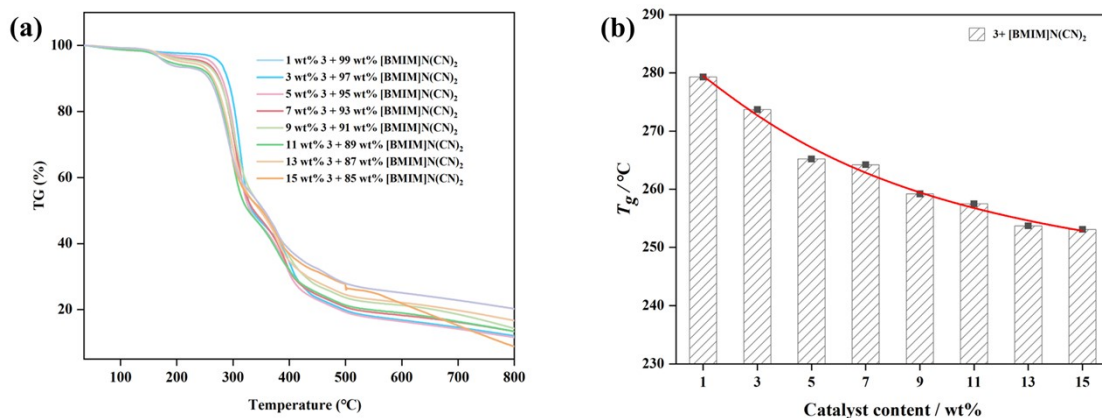

Fig. S8 Decomposition temperatures (a) and variation rule (b) of MOF 3 + [BMIM]N(CN)<sub>2</sub>

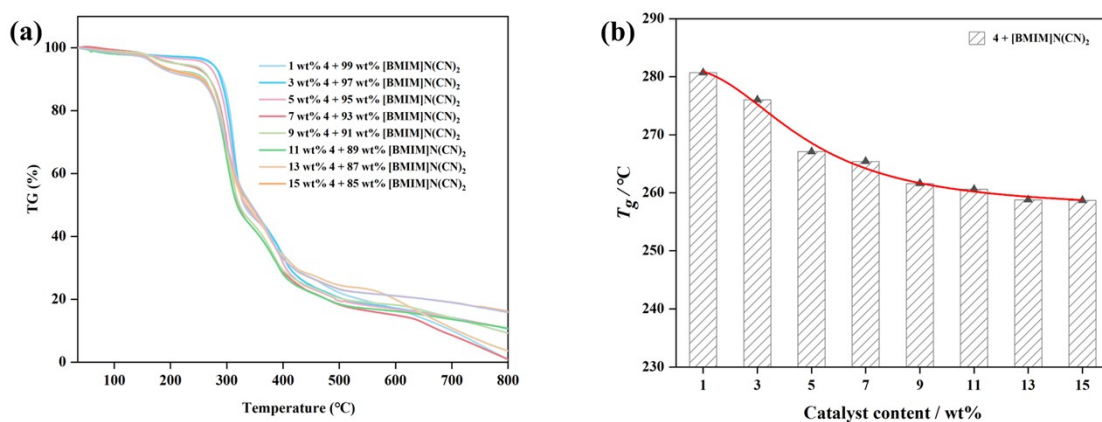

Fig. S9 Decomposition temperatures (a) and variation rule (b) of MOF 4 + [BMIM]N(CN)<sub>2</sub>

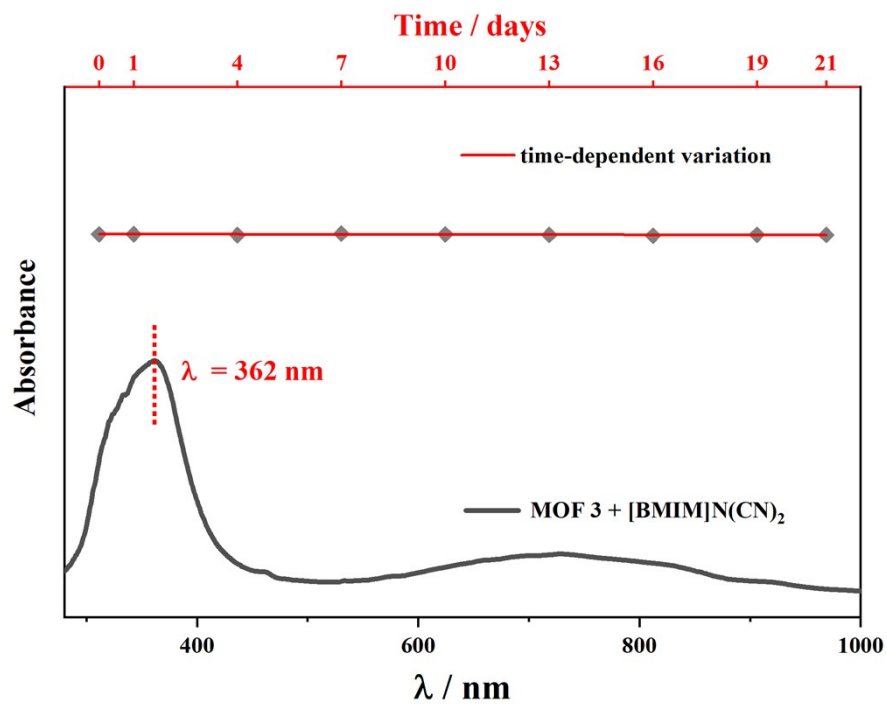

Fig. S10 UV-vis spectra of MOF 3 + [BMIM]N(CN)<sub>2</sub> and its absorbance with time at 362 nm

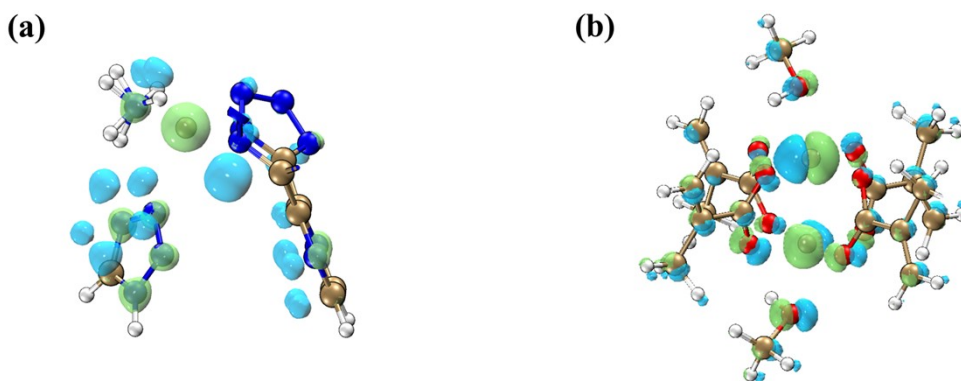

**Fig. S11** The charge density difference plots for MOFs **1** (a) and **4** (b) The green and blue areas denote the electron accumulation and depletion regions, respectively. The C, N, O, Cu, and H atoms are represented by gold, blue, red, silver white balls, respectively

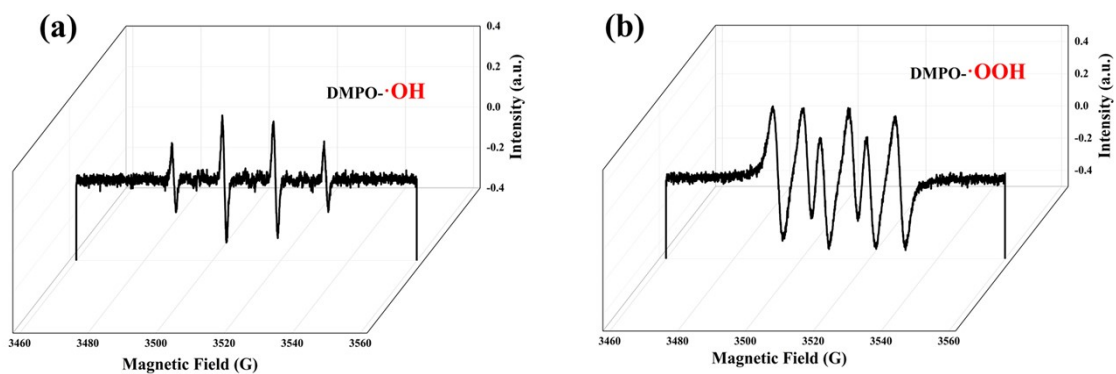

**Fig. S12** EPR spectra (a) DMPO-·OH and (b) DMPO-·OOH in MOF **1** + [BMIM]N(CN)<sub>2</sub> + H<sub>2</sub>O<sub>2</sub> system

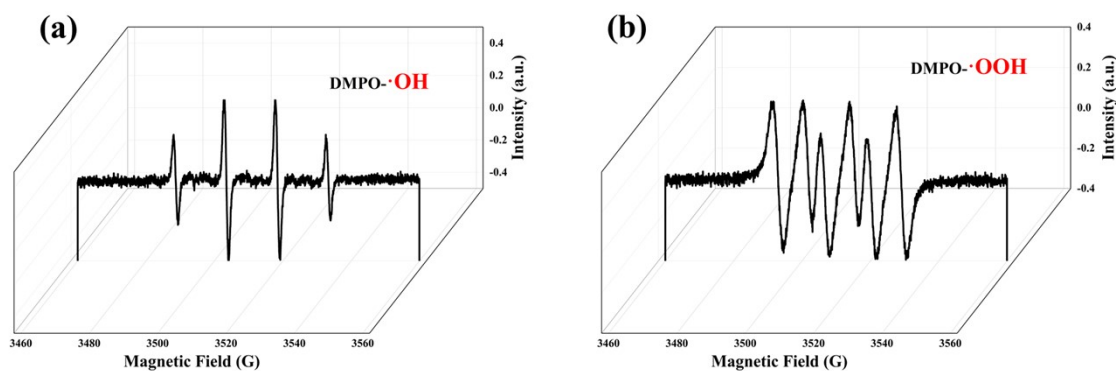

**Fig. S13** EPR spectra (a) DMPO-·OH and (b) DMPO-·OOH in MOF **2** + [BMIM]N(CN)<sub>2</sub> + H<sub>2</sub>O<sub>2</sub> system

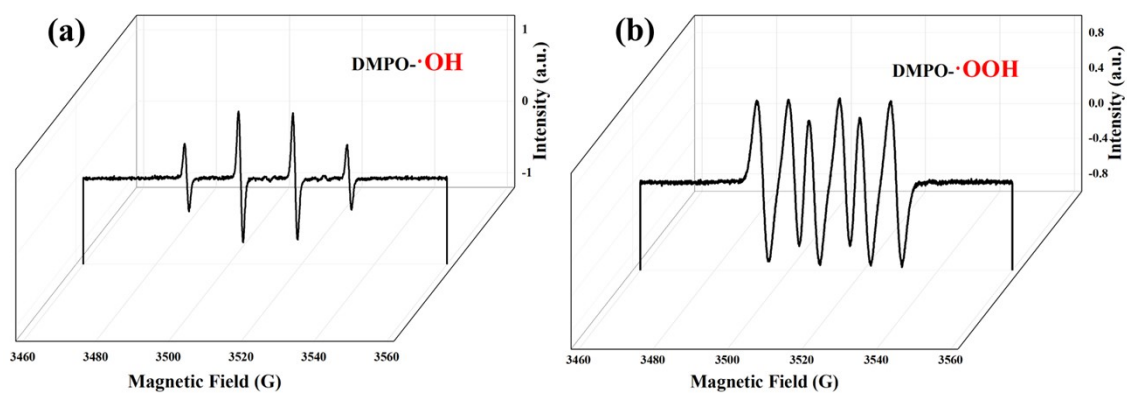

**Fig. S14** EPR spectra (a) DMPO-•OH and (b) DMPO-•OOH in MOF **3** + [BMIM]N(CN)<sub>2</sub> + H<sub>2</sub>O<sub>2</sub> system

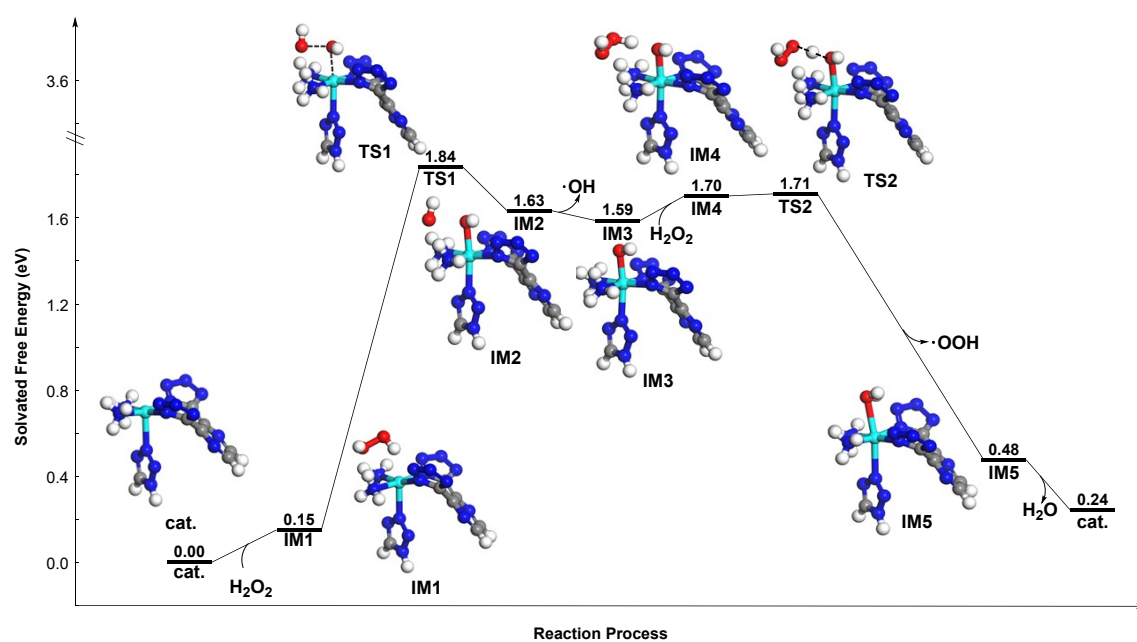

**Fig. S15** DFT calculations of H<sub>2</sub>O<sub>2</sub> catalyzed by MOF **1**

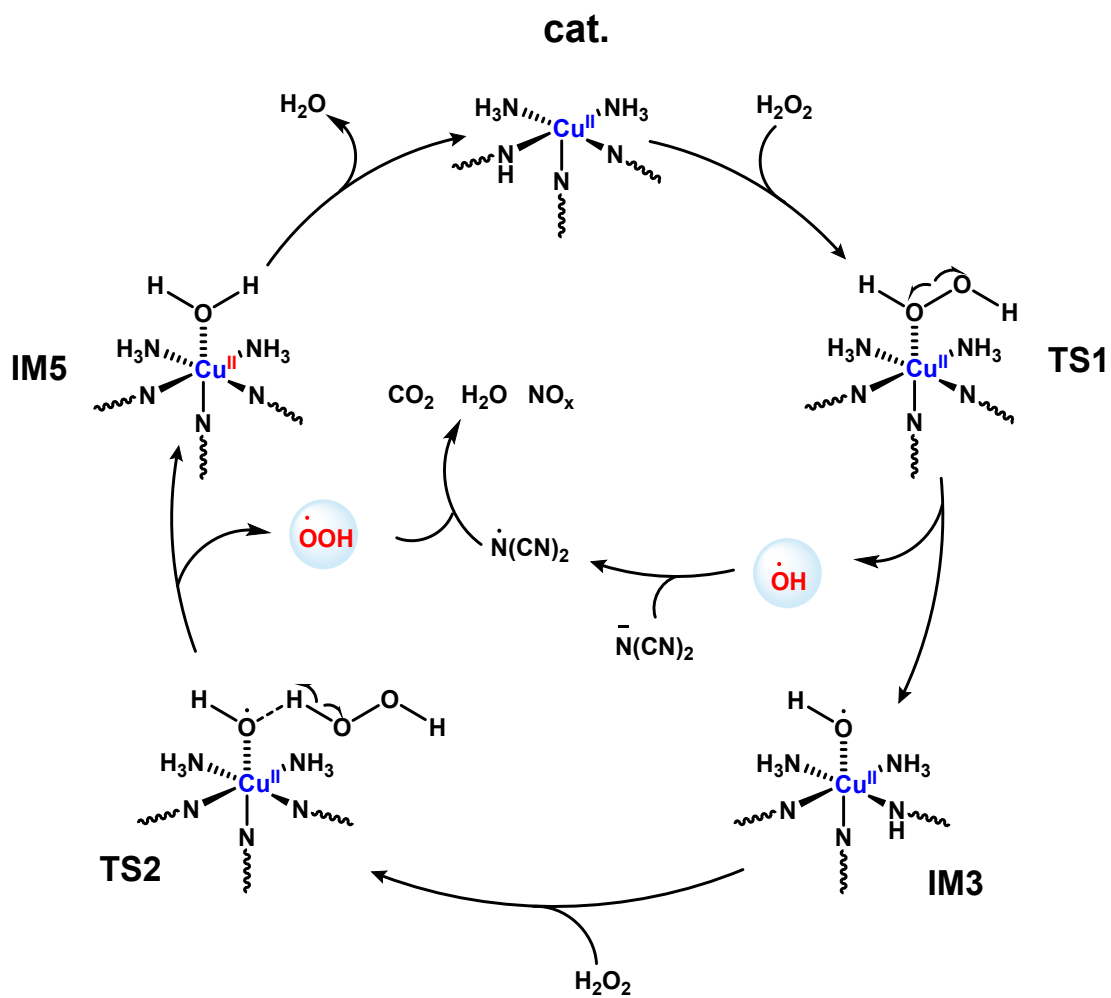

Fig. S16 Proposed catalytic mechanism of MOF 1 as catalyst
